# Supplementary material
Source: publisher figshare collection journal article supplement (https://gsapubs.figshare.com/articles/dataset/_/27284892)
Supplement: Supplementary file 1 [file 2]

## Sheet: Data S1-Meter scale
Well	Sample	Depth	Lithology	TOC	TS	δ13C	δ18O	Zr	Hf	Zr/Cr	Ni	Cu	Mo	Sr/Cu	Sr	CIA	Sr/Ba	U/Th	V/Cr	V/(V+Ni)	V/Ni	Ni/Co
		m		%	%	‰	‰	ppm	ppm	ppm/ppm	ppm	ppm	ppm	ppm/ppm	ppm		ppm/ppm	ppm/ppm	ppm/ppm	ppm/ppm	ppm/ppm	ppm/ppm
W213	W213-5	3739.52	Shale	2.74	1.62	-1.7	-9.3	66.3	2.39	1.34756	61.3	36.9	17.2	3.27913	121	69.1319	0.1099	0.574306	2.60163	0.676175	2.08809	5.10833
W213	W213-4	3739.55	Shale	2.79	1.32	-1.7	-9.6	51.5	1.36	1.28109	44.9	32.7	15.4	2.93578	96	69.5541	0.121519	0.712513	2.14677	0.657774	1.92205	4.35922
W213	W213-3	3739.57	Shale	2.7	1.54	-1.7	-9.6	49.4	1.59	1.18182	51.9	35	17	2.91429	102	69.1454	0.12	0.578899	2.24402	0.643789	1.80732	4.4359
W213	W213-2	3739.6	Shale	2.39	1.91	-1.5	-9.4	60.1	2.24	1.26793	42.5	38.1	15.6	3.2021	122	70.0296	0.100082	0.446405	2.19409	0.709898	2.44706	4.16667
W213	W213-17	3741.08	Shale	5.03	2.7	-1.3	-9.4	20	0.567	0.539084	117	64.5	49.7	1.32093	85.2	71.1637	0.0899683	2.78779	4.87871	0.607383	1.54701	6.39344
W213	W213-16	3741.11	Shale	5.47	3.03	-1.2	-8.4	42.3	1.08	0.965753	126	76.1	60	1.30355	99.2	72.4615	0.110345	2.85876	5.3653	0.65097	1.86508	7.11864
W213	W213-15	3741.14	Shale	5.09	4.31	-0.9	-7.8	70.5	2.27	1.21343	159	87.5	68.7	1.53143	134	71.2552	0.114334	1.91824	5.45611	0.665966	1.99371	8.07107
W213	W213-14	3741.17	Shale	4.41	2.12	-1.6	-8.4	42	1.42	1.13514	111	65.1	43.7	1.39631	90.9	71.0762	0.114196	2.16017	5	0.625	1.66667	8.95161
W213	W213-9	3741.18	Shale	3.42	1.71	-1.4	-10.5	18.5	0.444	0.51676	68.7	38.3	18.2	1.71802	65.8	67.4809	0.0895238	2.57036	3.15642	0.621904	1.64483	6.02632
W213	W213-13	3741.19	Shale	4.28	1.44	-2.1	-9.7	24	0.673	0.631579	79.4	38.5	30.3	1.70649	65.7	68.7404	0.103628	2.36328	3.81579	0.646168	1.8262	8.9819
W213	W213-8	3741.21	Shale	2.06	4.96	-1.1	-9.7	106	4.31	6.70886	58.4	30.9	17.5	3.59223	111	71.981	0.0813783	0.681223	5.33544	0.59075	1.44349	4.49231
W213	W213-7	3741.23	Shale	1.54	8.49	-1.3	-9.3	47.7	1.48	1.99582	129	76.3	42.8	1.88729	144	60.8602	0.176687	1.61188	1.71967	0.241623	0.318605	2.49035
W213	W213-6	3741.26	Shale	4.22	4.25	-0.7	-6.4	103	3.99	2.71053	132	68.1	31.4	2.21733	151	73.4978	0.0796834	0.889488	3.89474	0.528571	1.12121	6.37681
W213	W213-12	3741.37	Shale	5.49	2.6	-2.9	-10.6	28	0.799	0.909091	94.3	55.7	35.8	3.08797	172	74.5317	0.220796	10.3891	4.25325	0.581447	1.38918	4.38605
W213	W213-11	3741.4	Shale	5.56	3.43	-3.1	-11	31.7	0.807	0.856757	113	82.3	35.7	2.10207	173	72.1634	0.238292	9.25743	3.97297	0.565385	1.30088	5.15982
W213	W213-10	3741.42	Shale	5.36	4.24	-3.6	-11.3	45.3	1.05	0.928279	149	75.5	50.6	4.07947	308	71.2161	0.320833	7.92472	3.77049	0.552553	1.2349	5.58052
W213	W213-18	3742.38	Shale	4.28	1.61	-1.9	-9.2	21.6	0.634	0.757895	88.6	46.6	33	1.65021	76.9	70.9428	0.101854	1.8569	5.7193	0.647854	1.83973	7.91071
W213	W213-22	3743.28	Shale	5.04	3.59	-1.4	-8.6	51.1	1.45	1.01996	136	63	75.6	3.79365	239	71.1052	0.288996	5.42008	4.2515	0.610315	1.56618	5.07463
W213	W213-21	3743.32	Shale	4.45	5.51	-0.8	-8.5	37.6	1.3	0.828194	127	59.3	55.1	3.55818	211	71.3217	0.245634	3.28431	4.5815	0.620896	1.6378	7.8882
W213	W213-20	3743.35	Shale	5.06	3.08	-0.8	-7.7	48.2	1.38	0.95825	130	70.3	70.3	2.9872	210	71.3474	0.218069	3.31132	4.35388	0.627507	1.68462	6.70103
W213	W213-19	3743.38	Shale	4.01	14	-0.5	-8.1	41.3	1.24	0.960465	107	69.9	51.8	2.54649	178	70.8997	0.200903	2.54286	4	0.616487	1.60748	7.27891
W213	W213-25	3744.22	Shale	4.39	5.78	-0.8	-8.2	55.3	2.42	1.41432	127	74.7	67.7	2.3427	175	72.0026	0.155556	2.48148	5.8312	0.642254	1.79528	8.24675
W213	W213-24	3744.25	Shale	4.68	2.09	-0.9	-8.1	31	0.832	0.95679	97.2	51.3	51.5	3.48928	179	75.5434	0.238985	4.3994	4.90741	0.620609	1.6358	7.04348
W213	W213-23	3744.28	Shale	4.53	1.83	-1.2	-8.4	29.3	0.783	1.14008	85.4	39.3	45.5	4.07125	160	77.3176	0.246533	4.24497	5.64202	0.62934	1.69789	7.98131
W213	W213-26	3745	Shale	5.07	2.69	-0.6	-8.2	34.1	0.916	0.854637	115	59.6	69.7	3.50671	209	73.0772	0.280537	3.19071	5.28822	0.647239	1.83478	7.14286
W213	W213-27	3745.02	Shale	4.22	2.23	-0.7	-9.2	45.8	1.22	1.09308	97.9	52	60.7	4.86538	253	72.1531	0.327296	2.9366	5.3222	0.694921	2.27783	7.04317
W213	W213-28	3745.28	Shale	2.34	1.26	-0.3	-8.3	42.1	1.23	0.873444	110	65.9	73.4	3.18665	210	72.2825	0.242215	2.40166	4.52282	0.664634	1.98182	6.8323
W213	W213-30	3745.71	Shale	5.115	2.57	-1.1	-7.7	57.3	1.68	1.146	154	60.1	111	3.41098	205	67.7021	0.258512	5.03738	7.48	0.708333	2.42857	10.4762
W213	W213-29	3745.74	Shale	4.7	1.92	-1.3	-7.8	47.5	1.27	1.07466	136	57.2	97.7	3.75874	215	67.601	0.296961	4.32074	8.59729	0.736434	2.79412	11.2397
W213	W213-32	3746.58	Shale	5.12	1.71	-1	-10.4	14.8	0.394	0.472843	114	41.8	57.2	1.88995	79	75.9717	0.130363	4.73684	14.7923	0.802426	4.0614	20.177
W213	W213-31	3746.61	Shale	6.42	1.37	-0.6	-10.3	29.7	0.845	0.735149	166	57.1	89.3	1.67426	95.6	74.0129	0.123674	4.46903	16.2129	0.797808	3.94578	19.2799
W213	W213-34	3747.13	Shale	7.35	0.918	-1.3	-10.5	20.9	0.546	0.649068	128	47.6	68.5	1.31933	62.8	74.4523	0.100965	6.18812	25.6832	0.865969	6.46094	25.1473
W213	W213-33	3747.15	Shale	6.35	1.2	-1.3	-10.8	15.6	0.391	0.47561	121	40.8	59.2	1.8848	76.9	75.6476	0.122843	7.98834	24.6037	0.869612	6.66942	23.7255
W213	W213-37	3747.26	Shale	9.15	1.47	-0.4	-10.3	37.2	0.997	0.600969	191	96.3	128	0.62513	60.2	71.7566	0.0821282	6.70347	24.0549	0.88631	7.79581	23.4069
W213	W213-36	3747.29	Shale	8.92	1.8	-0.1	-9.7	52.3	1.41	0.680104	232	107	168	0.816822	87.4	71.5395	0.0978723	6.69903	22.8088	0.883182	7.56034	20
W213	W213-35	3747.32	Shale	9.25	1.66	-0.3	-10.8	46.2	1.11	0.568266	243	124	184	0.7	86.8	71.9587	0.0958057	6.9213	19.6433	0.867935	6.57202	20.9483
W213	W213-39	3748.8	Shale	2.08	0.928	-0.9	-8.9	138	4.47	1.92201	55.2	86.6	1.64	1.57044	136	71.884	0.0997067	0.420968	2.28412	0.748175	2.97101	4.1194
W213	W213-38	3748.83	Shale	3.07	1.33	-1.6	-8.9	137	4.21	1.79085	71.6	107	2.8	0.990654	106	71.9522	0.0828125	0.479545	2.30065	0.710824	2.4581	4.21176

## Sheet: Data S2-Centimeter scale
Well	Block	Sample	Depth	Lithology	TOC	TS	δ13C	δ18O	Zr	Hf	Zr/Cr	Ni	Cu	Mo	Sr/Cu	Sr	Sr/Ba	U/Th	V/Cr	V/(V+Ni)	V/Ni	Ni/Co	Pb	Hg	Hg/TOC
			m		%	%	‰	‰	ppm	ppm	ppm/ppm	ppm	ppm	ppm	ppm/ppm	ppm	ppm/ppm	ppm/ppm	ppm/ppm	ppm/ppm	ppm/ppm	ppm/ppm	ppm	ppb	ppb/%
W214	3-120-35	W-38	3566.9	Shale	2.36	1.9	-2.09881	-6.68355	101	2.75	1.79078	245	48	12	2.85417	137	0.0844116	0.873684	1.48404	0.59743	0.341633	18.8462	32.6
W214	3-120-35	W-37	3566.9	Shale	2.28	2.13	-2.21955	-6.96801	96.9	2.68	1.67938	147	51.6	12.6	2.67442	138	0.0770519	0.68	1.64125	0.621391	0.644218	11.1364	33.8
W214	3-120-35	W-36	3566.9	Shale	2.14	1.95	-2.24539	-7.08475	89.1	2.52	1.55226	123	50.5	13.3	2.65347	134	0.0799046	0.675	1.49652	0.599442	0.698374	9.46154	33.4
W214	3-120-35	W-35	3566.9	Shale	1.65	2.165	-2.71349	-7.42819	87.1	2.67	1.58076	74	48.9	14	3.55828	174	0.0940032	0.46371	1.78766	0.641276	1.33108	5.87302	34
W214	3-120-35	W-34	3566.9	Shale	1.24	4.26	-3.22043	-7.72571	130	4.39	2.35935	148	47.2	14.5	4.44915	210	0.091944	0.31746	2.2323	0.690623	0.831081	11.84	41.8
W214	3-120-35	W-33	3566.91	Bentonite	0.5	3.48	-3.79002	-7.96988	182	7.48	6.08696	36.7	40.9	21.5	3.17848	130	0.0496752	0.282651	3.97993	0.799194	3.24251	3.30631	81.6
W214	3-120-35	W-32	3566.91	Bentonite	0.46	2.93	-12.36	-13.25	164	9.08	35.1178	25.6	17.4	7.84	7.01149	122	0.0500205	0.247588	14.9465	0.93729	2.72656	4.2953	43.7
W214	3-120-35	W-31	3566.91	Bentonite	0.426	3.08	-11.67	-12.37	162	8.94	29.2419	23.7	17.6	9.33	6.76136	119	0.0507679	0.24575	13.1769	0.929463	3.08017	3.96985	35.6
W214	3-120-35	W-30	3566.91	Bentonite	0.43	4.03	-11.72	-12.61	165	8.78	27.1382	25.4	17.1	11.7	6.54971	112	0.0403313	0.251956	16.7763	0.943745	4.01575	4.19835	36.2
W214	3-120-35	W-29	3566.91	Bentonite	0.461	2.88	-10.6	-12.47	170	8.79	29.6167	20.4	15.1	11.3	5.95364	89.9	0.0412007	0.24961	17.0557	0.944616	4.79902	3.51119	23.5
W214	3-120-35	W-28	3566.91	Bentonite	0.731	6.16	-2.65841	-8.10307	185	8.89	11.4198	52.4	36.7	19.5	2.75204	101	0.0432734	0.270588	6.7284	0.870607	2.08015	4.12598	47
W214	3-120-35	W-27	3566.91	Shale	1.81	3.42	-2.24201	-8.23756	1.21	0.103	0.029803	79.2	55.6	1.66	3.83094	213	0.505938	4.77381	1.05665	0.513772	0.541667	6.0458	7.65
W214	3-120-35	W-26	3566.91	Shale	2.29	1.75	-1.99581	-7.93936	88	2.49	1.79226	88.4	37	10.3	4.86486	180	0.100111	0.293791	1.51935	0.603072	0.843891	8.11009	23.9
W214	3-120-35	W-25	3566.92	Shale	2.27	2.07	-1.81731	-8.13439	75	1.89	1.3465	83.3	47.7	11.7	3.16562	151	0.0892435	0.365074	1.78815	0.641339	1.19568	6.17037	30.8
W214	3-120-35	W-24	3566.92	Shale	2.41	2.26	-1.62143	-7.34312	87.9	2.07	1.62177	107	51.6	12.2	2.63566	136	0.0877986	0.538835	1.77675	0.639867	0.9	7.37931	33.2
W214	3-120-35	W-23	3566.92	Shale	2.33	1.92	-1.92961	-7.79686	91.9	2.19	1.60946	159	48.7	12.6	2.50513	122	0.0872051	0.708571	1.87391	0.652041	0.672956	12.0455	29.4
W214	3-120-35	W-22	3566.92	Shale	2.48	1.93	-2.03161	-7.75667	78.3	1.87	1.45	58.3	45.9	11.1	2.96296	136	0.10119	0.785276	1.52963	0.604685	1.41681	4.48462	27.6
W214	3-120-35	W-21	3566.92	Shale	2.41	2.1	-1.99091	-7.7779	87.8	1.96	1.61101	56.6	44	9.98	2.84091	125	0.0953471	0.891892	1.61284	0.617275	1.553	4.42188	27.1
W214	3-120-35	W-20	3566.93	Shale	2.46	2.27	-1.95882	-7.96963	92.3	2.11	1.43994	62.2	54.2	12.5	2.73063	148	0.0945083	0.859873	1.77847	0.64009	1.8328	4.2027	33.5
W214	3-120-35	W-19	3566.93	Shale	2.34	2.21	-2.13225	-8.02061	98	2.27	1.71329	57.5	44.1	10.8	2.58503	114	0.0805085	0.825	1.72203	0.632627	1.71304	4.56349	27.6
W214	3-120-35	W-18	3566.93	Shale	2.37	1.91	-1.96406	-8.48232	85.2	1.9	1.42475	100	44	11.1	3.29545	145	0.0924745	0.789474	1.73913	0.634921	1.04	7.8125	27.5
W214	3-120-35	W-17	3566.94	Shale	2.37	2.21	-2.29369	-8.88715	146	3.35	2.37013	58.7	49.2	13.1	3.19106	157	0.084819	0.87234	1.93182	0.658915	2.02726	4.25362	32.3
W214	3-120-35	W-16	3566.94	Shale	2.43	2.72	-2.02012	-9.33035	176	4.27	2.8433	67.8	55.9	15.4	2.70125	151	0.0796414	0.815166	1.82553	0.646083	1.66667	4.46053	42.4
W214	3-120-35	W-15	3566.94	Shale	2.14	2.495	-2.10726	-9.22266	166	4.76	2.71686	56.7	43.9	13.2	3.57631	157	0.083245	0.614458	1.91489	0.656934	2.06349	4.46457	32.6
W214	3-120-35	W-14	3566.94	Shale	1.79	3.06	-2.44904	-9.46923	178	5.97	3.6853	55.8	42.7	16.6	3.0445	130	0.0564236	0.434375	2.42236	0.707804	2.09677	4.3937	46.5
W214	3-120-35	W-13	3566.95	Bentonite	1.05	6.22	-1.99909	-9.26708	268	13.3	16.2424	35.6	39.7	27.1	5.31486	211	0.0765602	0.418067	7.57576	0.883392	3.51124	3.4902	92.8
W214	3-120-35	W-12	3566.95	Bentonite	0.458	10.5	-11.02	-12.09	283	15.8	35.9593	36.7	36.8	25.4	5.86957	216	0.0756833	0.386691	17.2808	0.945298	3.70572	3.39815	101
W214	3-120-35	W-11	3566.95	Bentonite	0.518	10.9	-4.56411	-9.73918	258	15.5	34.6774	40.9	33.8	24.1	4.28994	145	0.0549867	0.385496	19.3548	0.950872	3.52078	3.68468	93.3
W214	3-120-35	W-10	3566.95	Bentonite	0.765	9.62	-2.51097	-8.44304	241	12.9	11.0046	40.4	53	29.4	1.73585	92	0.0400871	0.43128	5.47945	0.845666	2.9703	3.08397	119
W214	3-120-35	W-9	3566.95	Shale	2.04	1.63	-2.31429	-8.49005	137	4.7	2.70751	252	35.1	12.7	3.73219	131	0.0701285	0.370107	1.82806	0.646401	0.367063	19.5349	33.9
W214	3-120-35	W-8	3566.95	Shale	1.99	2.11	-2.29977	-9.09426	126	3.51	2.41843	95.9	40.1	11.8	3.8404	154	0.0876993	0.405512	1.75624	0.637187	0.954119	7.37692	28.8
W214	3-120-35	W-7	3566.95	Shale	2.45	2.28	-1.88999	-8.61412	135	3.36	2.24252	72.4	53.9	13.8	3.13544	169	0.0938889	0.528889	1.79402	0.642093	1.49171	4.76316	35.7
W214	3-120-35	W-6	3566.95	Shale	2.2	2.08	-2.18696	-8.67287	110	3.06	1.89983	68.3	48.8	12.8	2.84836	139	0.0885915	0.685864	1.7962	0.642372	1.52269	4.80986	31.6
W214	3-120-35	W-5	3566.96	Shale	2.145	2.145	-2.29335	-8.66034	114	3.09	2.04301	71	49.1	13.5	2.74949	135	0.0964286	0.828571	1.62903	0.619632	1.28028	5.07143	31.9
W214	3-120-35	W-4	3566.96	Shale	2.52	2.09	-2.19169	-8.72555	114	3.09	1.72727	78.3	52.7	13.5	2.7704	146	0.0854801	0.939024	1.68182	0.627119	1.41762	5.11765	33.2
W214	3-120-35	W-3	3566.96	Shale	2.15	1.75	-2.59309	-8.66417	120	3.52	2.22635	679	35	12.5	3.65714	128	0.0989181	0.900621	1.61039	0.616915	0.127835	52.2308	25.3
W214	3-120-35	W-2	3566.97	Shale	2.09	2.15	-2.36951	-8.02155	130	4.12	2.04082	89.7	45.6	14.8	2.69737	123	0.0807087	0.962963	1.69545	0.629004	1.20401	5.7871	31.8
W214	3-120-35	W-1	3566.98	Shale	2.06	1.74	-2.30247	-7.27056	133	5.12	2.5	71.6	45	11.9	2.86667	129	0.0887818	0.923077	1.95489	0.661578	1.45251	6.39286	26
W214	3-120-36	Y-17	3566.99	Shale	1.43	2.25			109	4.49	2.27083	54.5	42.5	14.2	2.98824	127	0.0804307	0.797468	2.47917	0.685879	2.18349	3.73288	31.1	162	113.287
W214	3-120-36	Y-18	3567	Shale	1.56	1.15			73	2.28	1.2415	53.4	49.6	10	3.00403	149	0.113654	0.75	2.19388	0.707237	2.41573	4.41322	24.1	131	83.9744
W214	3-120-36	Y-19	3567.01	Shale	1.73	1.29			92.8	2.44	1.61391	47.8	44.1	11	3.40136	150	0.118017	0.774194	2.29565	0.734149	2.76151	3.73437	24.9	132	76.3006
W214	3-120-36	Y-20	3567.02	Shale	1.7	1.25			104	2.54	1.67742	50.8	45	9.48	3.15556	142	0.106049	0.680982	2.14516	0.723613	2.61811	3.87786	25.3	125	73.5294
W214	3-120-36	Y-21	3567.02	Shale	1.74	1.28			95.2	2.07	1.59464	45.3	42.2	9.15	3.22275	136	0.10241	0.648148	2.24456	0.747351	2.95806	3.68293	24.9	128	73.5632
W214	3-120-36	Y-22	3567.03	Shale	1.77	1.39			93	2.07	1.57895	45.3	44.1	9.4	2.92517	129	0.0955556	0.620482	2.10526	0.732428	2.73731	3.56693	24.9	131	74.0113
W214	3-120-36	Y-23	3567.04	Shale	1.72	1.32			88.5	2.05	1.53114	43.8	43	8.87	3.06977	132	0.0969163	0.620755	1.95502	0.720663	2.57991	3.68067	25.5	116	67.4419
W214	3-120-36	Y-24	3567.05	Shale	1.66	1.35			90.2	2.2	1.49091	42.2	41.9	8.74	3.34129	140	0.0905563	0.594118	1.91736	0.733249	2.74882	3.63793	26.8	115	69.2771
W214	3-120-36	Y-25	3567.06	Shale	1.33	1.29			87.8	2.53	1.49066	38.2	37.2	8.61	3.79032	141	0.0811744	0.492893	2.05433	0.76005	3.16754	3.53704	27.1	104	78.1955
W214	3-120-36	Y-26	3567.07	Bentonite	0.6035	3.99			185	8.14	6.58363	25.3	34.8	16.8	5.08621	177	0.0727497	0.28271	3.95018	0.81438	4.38735	2.04032	62.8	122	202.154
W214	3-120-36	Y-27	3567.07	Shale	1.38	1.76			96.8	3.45	2.18018	34.8	34.7	7.05	3.89049	135	0.0766175	0.302419	1.93018	0.711203	2.46264	3.44554	28	102	73.913
W214	3-120-36	Y-28	3567.08	Shale	1.41	1.29			97.1	2.91	1.70351	39.5	39.3	7.23	3.79135	149	0.085583	0.533696	1.78947	0.720848	2.58228	3.87255	26.1	93.7	66.4539
W214	3-120-36	Y-29	3567.09	Shale	1.24	1.45			105	3.7	1.8617	36.1	36.9	8.82	4.44444	164	0.0798442	0.42437	1.93262	0.751206	3.01939	3.78407	33	96.4	77.7419
W214	3-120-36	Y-30	3567.09	Shale	0.849	2.54			84.4	4.38	2.82274	25.6	31.9	10.8	4.60815	147	0.0551595	0.224058	2.86957	0.770197	3.35156	3.54571	59.9	111	130.742
W214	3-120-36	Y-31	3567.1	Shale	0.324	4.95			122	7.19	15.1553	26.2	21.4	8.81	7.80374	167	0.0668803	0.194563	6.59627	0.669609	2.02672	2.40367	75.4	105	324.074
W214	3-120-36	Y-32	3567.11	Bentonite	0.279	4.89			116	7.58	13.8095	27.2	18.8	7.84	7.07447	133	0.0568619	0.188578	6.90476	0.680751	2.13235	2.90598	66.9	67.6	242.294
W214	3-120-73	Y-36	3573.29	Shale	4.39	2.325			35	0.997	0.833333	109	61.8	42	1.52265	94.1	0.105375	1.60508	4.95238	0.656151	1.90826	7.31544	20.9	231	52.6196
W214	3-120-73	Y-35	3573.3	Shale	4.86	1.36			29.8	0.821	0.811989	92.3	49.7	34.2	1.57948	78.5	0.0988665	1.99081	4.74114	0.653398	1.88516	8.62617	14.6	161	33.1276
W214	3-120-73	Y-34	3573.31	Shale	4.67	1.33			33.1	0.883	0.965015	84	46.3	31.8	1.57667	73	0.0726368	2.07668	4.60641	0.652893	1.88095	8.4	13.7	157	33.6188
W214	3-120-73	Y-33	3573.32	Shale	4.62	1.36			33.3	0.838	1.04717	85.3	46.3	33.2	1.58315	73.3	0.0970861	2.18462	4.84277	0.643544	1.80539	8.61616	14.2	165	35.7143
W214	3-120-73	Y-37	3573.33	Shale	4.36	1.84			39.3	0.974	0.885135	100	62.1	41.2	1.56844	97.4	0.102419	2.109	4.43694	0.6633	1.97	7.19424	19.8	216	49.5413
W214	3-120-73	Y-38	3573.34	Shale	4.01	3.49			67	1.71	1.1775	138	95	61.8	1.29474	123	0.0933941	2.07692	4.53427	0.651515	1.86957	6.54028	35.1	335	83.5411
W214	3-120-73	Y-39	3573.35	Shale	3.09	4.76			151	4.85	2.95499	126	89.6	62.9	1.99777	179	0.086182	0.93633	5.40117	0.686567	2.19048	7.45562	46.7	307	99.3528
W214	3-120-73	Y-40	3573.36	Bentonite	0.563	7.17			265	11.8	25.9804	75	28.8	12.1	4.47917	129	0.0464029	0.468172	14.6078	0.665179	1.98667	7.28155	26.6	165	293.073
W214	3-120-73	Y-41	3573.37	Bentonite	1.37	4.12			246	9.58	13.8202	66.7	38.8	20.9	4.38144	170	0.0663027	0.550588	8.65169	0.69778	2.30885	7.22644	24.8	193	140.876
W214	3-120-73	Y-42	3573.37	Shale	3.22	6.95			196	6.01	4.33628	126	73.2	50.5	3.55191	260	0.124105	1.06489	4.64602	0.625	1.66667	8.4	52.6	309	95.9627
W214	3-120-85	Y-1	3574.95	Shale	4.96	4			76.2	1.44	1.31379	166	75.4	85.3	3.2626	246	0.218667	1.97917	4.31034	0.600962	1.50602	6.91667	94.6	245	49.3952
W214	3-120-85	Y-2	3574.96	Shale	4.46	2.54			167	2.6	2.85959	121	66.5	60	3.78947	252	0.207578	1.99301	4.40068	0.679894	2.12397	7.51553	67.3	177	39.6861
W214	3-120-85	Y-3	3574.97	Shale	4.44	3.28			195	3.74	3.67925	121	59.8	61.6	4.74916	284	0.232406	1.69079	4.28302	0.652299	1.87603	7.46914	81.1	196	44.1441
W214	3-120-85	Y-4	3574.98	Shale	5.23	5.02			217	3.7	4.01852	175	82.8	95.1	2.62077	217	0.166029	1.94079	3.77778	0.538259	1.16571	6.57895	134	275	52.5813
W214	3-120-85	Y-5	3574.98	Shale	5.17	3.04			248	3.66	5.04065	145	73.7	85.1	3.54138	261	0.218593	2.0458	3.63821	0.552469	1.23448	8.89571	72.5	203	39.265
W214	3-120-85	Y-6	3574.99	Shale	4.43	3.15			166	4.26	3.75566	130	55.6	73.1	5.2518	292	0.183187	1.22667	5.02262	0.630682	1.70769	12.381	66	198	44.6953
W214	3-120-85	Y-7	3575	Bentonite	0.436	42.6			760	27	139.45	72	34.9	25.6	2.65043	92.5	0.0638812	1.09043	18.0917	0.57796	1.36944	11.4833	121	222	509.174
W214	3-120-85	Y-8	3575	Bentonite	0.189	45.4			798	25.8	241.818	57	30.2	12.1	2.91722	88.1	0.0638406	0.871795	19.697	0.532787	1.14035	12.6106	112	206	1089.95
W214	3-120-85	Y-9	3575.01	Shale	1.57	39.7			374	12.3	29.6825	444	100	77.4	1.18	118	0.353293	1.18065	6.5	0.155733	0.184459	36.3934	453	653	415.924
W214	3-120-85	Y-10	3575.02	Shale	4.035	3.55			269	6.62	6.69154	128	34.6	61.9	7.57225	262	0.166349	2.17241	4.55224	0.588424	1.42969	11.7431	87.6	161	39.9009
W214	3-120-85	Y-11	3575.02	Shale	4.65	4.94			223	4.56	4.44223	196	70.4	93.7	3.48011	245	0.226433	2.30597	3.7251	0.488251	0.954082	8.34043	113	250	53.7634
W214	3-120-85	Y-12	3575.03	Bentonite	3.7	9.89			279	8.77	9.20792	187	60.7	78.9	3.01483	183	0.111246	2.28108	6.10561	0.497312	0.989305	12.8966	145	287	77.5676
W214	3-120-85	Y-13	3575.03	Shale	4.72	4.31			285	6.8	6.15551	158	49.3	78.3	4.07708	201	0.139293	2.33333	3.99568	0.539359	1.17089	9.51807	78.4	240	50.8475
W214	3-120-85	Y-14	3575.04	Shale	3.55	3.5			359	9.98	8.01339	119	41.1	58.7	5.01217	206	0.0997096	1.45017	5.75893	0.68435	2.16807	12.0567	68.2	176	49.5775
W214	3-120-85	Y-15	3575.04	Bentonite	0.595	16.7			407	13.6	28.2639	128	30.8	47.2	2.83117	87.2	0.0511137	1.43108	10.8333	0.549296	1.21875	12.8	119	173	290.756
W214	3-120-85	Y-16	3575.05	Shale	3.6	3.37			197	5.42	6.23418	119	32.7	43.8	6.26911	205	0.115558	1.47445	5.98101	0.613636	1.58824	11.7822	58	162	45
L205	9-90-41/42	Y-43	4037.96	Shale	1.65	0.651			53.2	1.23	0.739917	34.5	87	4.01	2.90805	253	0.112444	0.383333	2.48957	0.838407	5.18841	5.62806	17.6	43.4	26.303
L205	9-90-41/42	Y-44	4037.97	Shale	0.696	0.362			44.9	0.96	0.967672	25.6	49.3	1.53	6.40974	316	0.211796	0.380282	2.41379	0.813953	4.375	6.35236	10.7	23.4	33.6207
L205	9-90-41/42	Y-45	4037.97	Bentonite	0.294	0.109			26.4	0.472	1.21101	14.6	22	0.551	9.09091	200	0.321027	0.669323	1.70183	0.717602	2.5411	7.05314	4.28	10.6	36.0544
L205	9-90-41/42	Y-46	4037.99	Shale	1.06	0.522			79.2	1.76	1.20365	30.7	107	1.26	2.37383	254	0.118692	0.277193	2.34043	0.833785	5.01629	5.2931	16.5	32.3	30.4717
L205	9-90-41/42	Y-47	4037.99	Shale	0.705	0.187			51.4	1.11	1.13216	22.9	47.2	0.775	6.58898	311	0.20596	0.369081	2.42291	0.82769	4.80349	6.98171	8.16	15.2	21.5603
L205	9-90-41/42	Y-48	4038.01	Shale	1.41	0.751			70	1.54	1.04322	34.1	108	1.31	1.15741	125	0.0595806	0.244444	2.23547	0.814775	4.39883	4.63946	20.4	39.8	28.227
L205	9-90-41/42	Y-49	4038.01	Shale	1.35	1.35			57.4	1.37	0.78738	43	103	1.65	0.958252	98.7	0.0407346	0.187162	2.13992	0.78392	3.62791	4.01869	31.5	53.6	39.7037
L205	9-90-41/42	Y-50	4038.03	Shale	1.44	0.815			94.6	2.37	1.42685	38.6	96.4	0.959	0.924274	89.1	0.0363525	0.263057	2.11161	0.783875	3.62694	4.6506	33.5	41.4	28.75
L205	9-90-41/42	Y-51	4038.03	Bentonite	0.894	3.2			212	9.11	3.8061	45.4	74.4	2.9	1.89516	141	0.0390582	0.155	2.45961	0.751096	3.01762	3.51938	59.7	75.6	84.5638
L205	9-90-41/42	Y-52	4038.05	Shale	1.16	0.57			115	2.89	1.44472	34.7	114	0.724	1.52632	174	0.0618337	0.246053	1.92211	0.815131	4.40922	4.78621	25.4	34.5	29.7414
L205	9-90-41/42	Y-53	4038.07	Shale	1.6	0.802			101	2.04	1.10022	41.8	122	0.78	1.02459	125	0.0441384	0.218239	1.78649	0.79689	3.92344	4.50431	31.8	46.3	28.9375
L205	9-90-41/42	Y-54	4038.07	Shale	1.165	0.7755			103	1.96	1.36605	30.2	86.3	0.553	1.2051	104	0.0437526	0.214286	1.9496	0.829571	4.86755	3.86189	23.3	47.2	40.515
