# Supplementary material
Source: publisher figshare collection journal article supplement (https://gsapubs.figshare.com/articles/dataset/_/27284892)
Supplement: Supplementary file 1 [file 2]

Chao Liang, Hao-Ran Xie, Jing Wu, Ying-Chang Cao, Yu Han, Ke-Yu Liu, Fang Hao., 2024, Volcanic activity driving rapid organic carbon burial during the Ordovician–Silurian transition: GSA Bulletin, <https://doi.org/10.1130/B37946.1>.

## Supplemental Material

**Table S1.** Typical volcanic ash wells/sections from Late Ordovician–Early Silurian in Yangtze Block.

**Table S2.** Thickness of the thickest Late Ordovician–Early Silurian bentonite layer in the Yangtze Block.

**Table S3.** Global organic carbon content of main shales from Late Ordovician–Early Silurian.

# Supplemental File S1

Table S1. Typical volcanic ash wells/sections from Late Ordovician–Early Silurian in Yangtze Block

| Number | Wells/Sections                    | Abbreviation | Location            | Formation                 | References                         |
|--------|-----------------------------------|--------------|---------------------|---------------------------|------------------------------------|
| 1      | Nanbazi                           | NBZ          | Yichang, Hubei      | Wufeng–Longmaxi Formation | <a href="#">Su et al., 2003</a>    |
| 2      | Huanghuachang                     | HHC          | Xuancheng, Anhui    | Wufeng–Longmaxi Formation | <a href="#">Su et al., 2009</a>    |
| 3      | Gaojiabian                        | GJB          | Zhenjiang, Jiangsu  | Wufeng–Longmaxi Formation | <a href="#">Su et al., 2009</a>    |
| 4      | Jiuxi                             | JX           | Changde, Hunan      | Wufeng–Longmaxi Formation | <a href="#">Su et al., 2009</a>    |
| 5      | Luojiang                          | LJ           | Chengkou, Chongqing | Wufeng–Longmaxi Formation | <a href="#">Su et al., 2009</a>    |
| 6      | Nanbazi                           | NBZ          | Zunyi, Guizhou      | Wufeng–Longmaxi Formation | <a href="#">Su et al., 2009</a>    |
| 7      | Wangjiawan                        | WJW          | Yichang, Hubei      | Wufeng–Longmaxi Formation | <a href="#">Su et al., 2009</a>    |
| 8      | Mingzhong1                        | MZ1          | Chengkou, Chongqing | Wufeng–Longmaxi Formation | <a href="#">Ran et al., 2015</a>   |
| 9      | Maliu                             | ML           | Ankang, Shaanxi     | Wufeng–Longmaxi Formation | <a href="#">Xiong et al., 2017</a> |
| 10     | Piwo                              | PW           | Dazhou, Sichuan     | Wufeng–Longmaxi Formation | <a href="#">Xiong et al., 2017</a> |
| 11     | Liangbai                          | LBP          | Hanzhong, Shaanxi   | Wufeng–Longmaxi Formation | <a href="#">Ge et al., 2018</a>    |
| 12     | Shuanghe2                         | SH2          | Yibin, Sichuan      | Wufeng–Longmaxi Formation | <a href="#">Wang et al., 2018</a>  |
| 13     | JY41-5                            | JY41-5       | —                   | Wufeng–Longmaxi Formation | <a href="#">Wu, 2018</a>           |
| 14     | PY1                               | PY1          | —                   | Wufeng–Longmaxi Formation | <a href="#">Wu, 2018</a>           |
| 15     | Qiliao2                           | QL2          | Shizhu, Chongqing   | Wufeng–Longmaxi Formation | <a href="#">Wang et al., 2019</a>  |
| 16     | Lunshan                           | LS           | Nanjing, Jiangsu    | Wufeng–Longmaxi Formation | <a href="#">Yang et al., 2019</a>  |
| 17     | LY1                               | LY1          | —                   | Wufeng–Longmaxi Formation | <a href="#">Wang et al., 2019</a>  |
| 18     | Liziping                          | LZP          | Shiyan, Hubei       | Wufeng–Longmaxi Formation | <a href="#">Xiong et al., 2019</a> |
| 19     | Yanzi                             | YZ           | Wuxi, Chongqing     | Wufeng–Longmaxi Formation | <a href="#">Xiong et al., 2019</a> |
| 20     | Laolin                            | LL           | Tongren, Guizhou    | Wufeng–Longmaxi Formation | <a href="#">Zhang, 2019</a>        |
| 21     | Tuochuanya                        | TCY          | Tongren, Guizhou    | Wufeng–Longmaxi Formation | <a href="#">Zhang, 2019</a>        |
| 22     | Tiekeng                           | TK           | Tongren Guizhou     | Wufeng–Longmaxi Formation | <a href="#">Zhang, 2019</a>        |
| 23     | Jiaoye-1                          | JY1          | —                   | Wufeng–Longmaxi Formation | <a href="#">Liu et al., 2019</a>   |
| 24     | Gantianzui                        | GTZ          | Zunyi Guizhou       | Wufeng–Longmaxi Formation | <a href="#">Du et al., 2020</a>    |
| 25     | Muchanggou                        | MCG          | —                   | Wufeng–Longmaxi Formation | <a href="#">Du et al., 2020</a>    |
| 26     | Wangjiawan<br>North               | WJWN         | Yichang, Hubei      | Wufeng–Longmaxi Formation | <a href="#">Du et al., 2020</a>    |
| 27     | XY5                               | XY5          | —                   | Wufeng–Longmaxi Formation | <a href="#">Hu et al., 2020</a>    |
| 28     | Honghuayuan                       | HHY          | Yichang, Hubei      | Wufeng–Longmaxi Formation | <a href="#">Hu et al., 2020</a>    |
| 29     | Wuxing                            | WX           | Hanzhong, Shaanxi   | Wufeng–Longmaxi Formation | <a href="#">Liu et al., 2020</a>   |
| 30     | Chongqing-<br>Guizhou<br>boundary | CQGZ         | —                   | Wufeng–Longmaxi Formation | <a href="#">Liu et al., 2020</a>   |
| 31     | Anji                              | AJ           | Huzhou, Zhejiang    | Wufeng–Longmaxi Formation | <a href="#">Liu et al., 2020</a>   |
| 31     | Songmutang                        | SMT          | Yiyang, Hunan       | Wufeng–Longmaxi Formation | <a href="#">Liu et al., 2020</a>   |
| 32     | EHD1                              | EHD1         | —                   | Wufeng–Longmaxi Formation | <a href="#">Lu et al., 2020</a>    |
| 33     | N211                              | N211         | —                   | Wufeng–Longmaxi Formation | <a href="#">Lu et al., 2020</a>    |
| 34     | Huangying                         | HYXP         | Wulong, Chongqing   | Wufeng–Guanyinqiao bed    | <a href="#">Men et al., 2020</a>   |
| 35     | Nanzheng                          | NFP          | Hanzhong, Shaanxi   | Wufeng–Guanyinqiao bed    | <a href="#">Men et al., 2020</a>   |
| 36     | Shuanghui                         | SHP          | Guangyuan, Sichuan  | Wufeng–Guanyinqiao bed    | <a href="#">Men et al., 2020</a>   |
| 37     | YY1                               | YY1          | —                   | Wufeng–Longmaxi Formation | <a href="#">Tang et al., 2020</a>  |

|    |                  |           |                     |                           |                                    |
|----|------------------|-----------|---------------------|---------------------------|------------------------------------|
| 38 | YY6              | YY6       | —                   | Wufeng–Longmaxi Formation | <a href="#">Tang et al., 2020</a>  |
| 39 | YY7              | YY7       | —                   | Wufeng–Longmaxi Formation | <a href="#">Tang et al., 2020</a>  |
| 40 | Lu-A             | Lu-A      | —                   | Wufeng–Longmaxi Formation | <a href="#">Tang et al., 2020</a>  |
| 41 | SY-1             | SY-1      | —                   | Wufeng–Longmaxi Formation | <a href="#">Yang et al., 2020</a>  |
| 42 | Xujiaba          | XJ        | Wuxi, Chongqing     | Wufeng–Longmaxi Formation | <a href="#">Zan et al., 2020</a>   |
| 43 | Mingzhong2       | MZ2       | Chengkou, Chongqing | Wufeng–Longmaxi Formation | <a href="#">Zan et al., 2020</a>   |
| 44 | Huadi 1          | HD1       | Guang 'an, Sichuan  | Wufeng–Longmaxi Formation | <a href="#">Ge, 2020</a>           |
| 45 | Fenghuang        | FH        | Youyang, Chongqing  | Wufeng–Longmaxi Formation | <a href="#">Ge, 2020</a>           |
| 46 | Xiema            | XM        | Xiangyang, Hubei    | Wufeng–Longmaxi Formation | <a href="#">Wang et al., 2020</a>  |
| 47 | J11-4            | JY11-4    | —                   | Wufeng–Longmaxi Formation | <a href="#">Du et al., 2021</a>    |
| 48 | XD2              | XD2       | —                   | Wufeng–Longmaxi Formation | <a href="#">Ge et al., 2021</a>    |
| 49 | YT3              | YT3       | —                   | Wufeng–Longmaxi Formation | <a href="#">Shen et al., 2021</a>  |
| 50 | XY-1             | XY-1      | —                   | Wufeng–Longmaxi Formation | <a href="#">Zan et al., 2021</a>   |
| 51 | Jienietuo        | JNT       | Liangshan, Sichuan  | Wufeng–Longmaxi Formation | <a href="#">Zhang et al., 2021</a> |
| 52 | Lvcongpo         | LCP       | Enshi, Hubei        | Wufeng–Longmaxi Formation | <a href="#">Zhang et al., 2021</a> |
| 53 | JY143-5          | JY143     | —                   | Wufeng–Longmaxi Formation | <a href="#">Zhao et al., 2021</a>  |
| 54 | Tianlin          | TL        | Luzhou, Sichuan     | Wufeng–Longmaxi Formation | <a href="#">Dong et al., 2022</a>  |
| 55 | JY11             | JY11      | Fuling, Chongqing   | Wufeng–Longmaxi Formation | <a href="#">Lu et al., 2022a</a>   |
| 56 | YY2              | YY2       | Enshi, Hubei        | Wufeng–Longmaxi Formation | <a href="#">Lu et al., 2022b</a>   |
| 57 | Wangjiawan(GSSP) | WJW(GSSP) | Yichang, Hubei      | Wufeng–Longmaxi Formation | <a href="#">Lu et al., 2022b</a>   |
| 58 | XD No.2          | XD No.2   | —                   | Wufeng–Longmaxi Formation | <a href="#">Men et al., 2022</a>   |
| 59 | Qiliao1          | QL1       | —                   | Wufeng–Longmaxi Formation | <a href="#">Qiu et al., 2022</a>   |
| 60 | Shaunghe1        | SH1       | Yibin, Sichuan      | Wufeng–Longmaxi Formation | <a href="#">Qiu et al., 2022</a>   |
| 61 | Tianba           | TB        | Ankang, Shaanxi     | Wufeng–Longmaxi Formation | <a href="#">Qiu et al., 2022</a>   |
| 62 | Chengkou         | CK        | Chengkou, Chongqing | Wufeng–Longmaxi Formation | <a href="#">Wang et al., 2022</a>  |
| 63 | W213             | W213      | —                   | Wufeng–Longmaxi Formation | <a href="#">This study</a>         |
| 64 | W214             | W214      | —                   | Wufeng–Longmaxi Formation | <a href="#">This study</a>         |
| 65 | L204             | L204      | —                   | Wufeng–Longmaxi Formation | <a href="#">This study</a>         |
| 66 | L205             | L205      | —                   | Wufeng–Longmaxi Formation | <a href="#">This study</a>         |
| 67 | N222             | N222      | —                   | Wufeng–Longmaxi Formation | <a href="#">This study</a>         |

## REFERENCES CITED

- Du, X.B., Lu, Y.C., Duan, D., Liu, Z.H., Zhao, K., Jia, J.X., Fu, H., 2020, Was volcanic activity during the Ordovician-Silurian transition in South China part of a global phenomenon? Constraints from zircon U-Pb dating of volcanic ash beds in black shales, *Marine and Petroleum Geology*, v. 114, p. 1-17, <https://doi.org/10.1016/j.marpetgeo.2019.104209>.
- Dong, Z.T., Wang, Z.T., Zhang, W.L., Zhao, F., Du, Y.H., Zhu, Y.X., Fu, X.H., Wang, C.Y., 2022, Dynamic sulfur and carbon cycles related to microbial sulfate reduction and volcanic activity during the Hirnantian glaciation in the Upper Yangtze Basin, South China, *Frontiers in Earth Science*, v. 10, p. 1-17, <https://doi.org/10.3389/feart.2022.971031>.
- Du, X.B., Jia, J.X., Zhao, K., Shi, J.C., Shu, Y., Liu, Z.H., Duan, D., 2021, Was the volcanism during the Ordovician-Silurian transition in South China actually global in extent? Evidence from the distribution of volcanic a

sh beds in black shales, *Marine and Petroleum Geology*, v. 123, p. 1-10, <https://doi.org/10.1016/j.marpetgeo.2020.104721>.

Ge, X.Y., Mou, C.L., Wang, C.S., Men, X., Chen, C., Hou, Q., 2018. Mineralogical and geochemical characteristics of K-bentonites from the Late Ordovician to the Early Silurian in South China and their geological significance. *Geological Journal*, v. 54, no. 1, p. 514-528, <https://doi.org/10.1002/gj.3201>.

Ge, X.Y., Mou, C.L., Yu, Q., Liu, W., Men, X., He, J.L., Lu, J.Z., Liang, W., 2021. Petrology and geochemistry of the K-bentonites at the Ordovician-Silurian transition in XD2 well, Daguan, Yunnan Province, *Geology of China*, v. 48, no. 3, p. 911-924, Doi: 10.12029/gc20210318.

Hu, D.P., Li, M.H., Zhang, X.L., Turchyn, V.A., Gong, Y.Z., Shen, Y.A., 2020. Large mass-independent sulphur isotope anomalies link stratospheric volcanism to the Late Ordovician mass extinction, *Nature Communications*, v. 11, p. 1-8, <https://doi.org/10.1038/s41467-020-16228-2>.

Liu, X.X., Jiang, Z.X., Zhang, K., Song, Y., Jiang, L., Jiang, S., Xuan, Q.X., Wen, M., Huang, Y.Z., Wang, X., Liu, T.L., Xie, X.L., 2019. Mechanism Analysis of Organic Matter Enrichment of Upper Ordovician-Lower Silurian Shale in the Upper Yangtze Area: Taking Jiaoye-1 Well in the Jiaoshiba Block as an Example, *Geofluids*, v. 2019, p. 1-13, <https://doi.org/10.1155/2019/5806023>.

Liu, W., Liu, Y., Zeng, Z.X., Yang, B.Z., Peng, L.H., Xu, D.L., Wei, Y.X., Li, Y.Q., Ellam, R.M., Xu, S., 2020. K-bentonites in Ordovician-Silurian transition from South China: implications for tectonic evolution in the northern margin of Gondwana, *Journal of the Geological Society*, v. 177, no. 6, p. 1245-1260, <https://doi.org/10.1144/jgs2020-049>.

Lu, Y.B., Hao, F., Lu, Y.C., Yan, D.T., Xu, S., Shu, Z.G., Wang, Y.X., Wu, L.Y., 2020. Lithofacies and depositional mechanisms of the Ordovician-Silurian Wufeng-Longmaxi organic-rich shales in the Upper Yangtze area, southern China, *AAPG Bulletin*, v. 104, no. 1, p. 97-129, <https://doi.org/10.1306/04301918099>.

Lu, Y.B., Hao, F., Shen, J., Lu, Y.C., Song, H.Y., Wang, Y.X., Gou, Q.Y., 2022a. High-resolution volcanism-induced oceanic environmental change and its impact on organic matter accumulation in the Late Ordovician Upper Yangtze Sea, *Marine and Petroleum Geology*, v. 136, p. 1-15, <https://doi.org/10.1016/j.marpetgeo.2021.105482>.

Lu, Y.B., Shen, J., Wang, Y.X., Lu, Y.C., Algeo, T.J., Jiang, S., Yan, D.T., Gou, Q.Y., 2022b. Seawater sources of Hg enrichment in Ordovician-Silurian boundary strata, South China, *Palaeogeography Palaeoclimatology Palaeoecology*, v. 601, p. 1-16, <https://doi.org/10.1016/j.palaeo.2022.111156>.

Men, X., Mou, C.L., Ge, X.Y., Wang, Y.C., 2020. Geochemical characteristics of siliceous rocks of Wufeng Formation in the Late Ordovician, South China: Assessing provenance, depositional environment, and formation model, *Geological Journal*, v. 55, no. 4, p. 2930-2950, <https://doi.org/10.1002/gj.3553>.

Men, X., Mou, C.L., Ge, X.Y., 2022. Changes in palaeoclimate and palaeoenvironment in the Upper Yangtze area (South China) during the Ordovician-Silurian transition, *Scientific Reports*, v. 12, no. 1, p. 1-26, <https://doi.org/10.1038/s41598-022-17105-2>.

Qiu, Z., Wei, H.Y., Tian, L., Corso, J.D., Zhang, J.Q., Zou, C.N., 2022. Different controls on the Hg spikes linked the two pulses of the Late Ordovician mass extinction in South China, *Scientific Reports*, v. 12, no. 1, p. 1-12, <https://doi.org/10.1038/s41598-022-08941-3>.

Ran, B., Liu, S.G., Jansa, L., Sun, W., Yang, D., Ye, Y.H., Wang, S.Y., Luo, C., Zhang, X., Zhang, C.J., 2015. Origin of the Upper Ordovician-lower Silurian cherts of the Yangtze block, South China, and their palaeogeographic significance, *Journal of Asian Earth Sciences*, v. 108, p. 1-17, <https://doi.org/10.1016/j.jseaes.2015.04.007>.

Shen, J.J., Wang, P.W., Chen, K.Q., Zhang, D.T., Wang, Y.M., Cai, Q.S., Meng, J.H., 2021. Relationship between volcanic activity and enrichment of shale organic matter during the Ordovician-Silurian transition in western

59 Hubei, Southern China, *Palaeogeography Palaeoclimatology Palaeoecology*, v. 577, p. 1-18, <https://doi.org/10.1016/j.palaeo.2021.110551>.

61 Su, W.B., He, L.Q., Wang, Y.B., Gong, S.Y., Zhou, H.Y., 2003, K-bentonite beds and high-resolution integrated stratigraphy of the uppermost Ordovician Wufeng and the lowest Silurian Longmaxi formations in South China, *Science in China Series D-Earth Sciences*, v. 46, no. 11, p. 1121-1133, <https://doi.org/10.1360/01yd0225>.

63 Su, W.B., Huff, W.D., Ettensohn, F.R., Liu, X.M., Zhang, J.E., Li, Z.M., 2009, K-bentonite, black-shale and flysch successions at the Ordovician-Silurian transition, South China: Possible sedimentary responses to the accretion of Cathaysia to the Yangtze Block and its implications for the evolution of Gondwana, *Gondwana Research*, v. 15, no. 1, p. 111-130, <https://doi.org/10.1016/j.gr.2008.06.004>.

65 Tang, L., Song, Y., Jiang, S., Jiang, Z.X., Li, Z., Yang, Y.D., Li, X.H., Xiao, L., 2020, Organic matter accumulation of the Wufeng-Longmaxi shales in southern Sichuan Basin: Evidence and insight from volcanism, *Marine and Petroleum Geology*, v. 120, p. 1-20, <https://doi.org/10.1016/j.marpetgeo.2020.104564>.

68 Wang, G., Zhan, R., Percival, I.G., 2019, The end-Ordovician mass extinction: A single-pulse event? *Earth-Science Reviews*, v. 192, p. 15-33, <https://doi.org/10.1016/j.earscirev.2019.01.023>.

71 Wang, Y.M., Li, X.J., Chen, B., Wu, W., Dong, D.Z., Zhang, J., Han, J., Ma, J., Dai, B., Wang, H., Jiang, S., 2018, Lower limit of thermal maturity for the carbonization of organic matter in marine shale and its exploration risk, *Petroleum Exploration and Development*, v. 45, no. 3, p. 385-395, [https://doi.org/10.1016/S1876-3804\(18\)30045-4](https://doi.org/10.1016/S1876-3804(18)30045-4).

73 Wang, Y.M., Wang, H.Y., Shen, J.J., Bai, W.H., Dong, D.Z., Qiu, Z., Li, X.J., Wang, C.H., 2020, A new discovery and geological significance of thick-layered bentonites in the Upper Member of Lower Silurian Longmaxi Formation in the Northern Sichuan-Western Hubei area, *Acta Petrolei Sinica*, v. 41, no. 11, p. 1309-1323 (in Chinese with English abstract), DOI:10.7623/syxb202011002.

76 Wang, Y.M., Wang, H.Y., Qiu, Z., Shen, J.J., Zhang, Q., Zhang, L.F., Wang, C.H., Li, X.J., 2022, Basic characteristics of key interfaces in Upper Ordovician Wufeng Formation - Lower Silurian Longmaxi Formation in Sichuan Basin and its periphery, SW China, *Petroleum Exploration and Development*, v. 49, no. 1, p. 37-51, [https://doi.org/10.1016/S1876-3804\(22\)60003-X](https://doi.org/10.1016/S1876-3804(22)60003-X).

81 Wu, L.Y., 2018, Relationship between the origin of organic-rich shale and geological events of the Upper Ordovician-Lower Silurian in the Upper Yangtze area [Ph.D. thesis]: Wuhan, China University of Geosciences, 104 p (in Chinese with English abstract).

83 Xiong, G.Q., Wang, J., Li, Y.Y., Yu, Q., Men, Y.P., Zhou, X.L., Xiong, X.H., Zhou, Y.X., Yang, X., 2017, Zircon U-Pb dating and geological significance of the bentonites from the Upper Ordovician Wufeng Formation and Lower Silurian Longmaxi Formation in western Daba Mountains, *Sedimentary Geology and Tethyan Geology*, v. 37, no. 2, p. 46-58 (in Chinese with English abstract).

86 Xiong, G.Q., Wang, J., Li, Y.Y., Yu, Q., Men, Y.P., Zhou, X.L., Xiong, X.H., Zhou, Y.X., Yang, X., 2019, Zircon U-Pb dating of K-bentonite from Late Ordovician Wufeng Formation and Earlier Silurian Longmaxi Formation in the eastern section of south Dabashan and its tectonic significance, *Acta Geologica Sinica*, v. 93, no. 4, p. 843-864 (in Chinese with English abstract), DOI:10.19762/j.cnki.dizhixuebao.2019125.

89 Yang, S.C., Hu, W.X., Wang, X.L., Jiang, B.Y., Yao, S.P., Sun, F.N., Huang, Z.C., Zhu, F., 2019, Duration, evolution, and implications of volcanic activity across the Ordovician-Silurian transition in the Lower Yangtze region, South China, *Earth and Planetary Science Letters*, v. 518, p. 13-25, <https://doi.org/10.1016/j.epsl.2019.04.020>.

92 Yang, S.C., Hu, W.X., Yao, S.P., Wang, X.L., He, W.H., Wang, Y., Zhu, F., Sun, F.N., 2020, Constraints on the accumulation of organic matter in Upper Ordovician-lower Silurian black shales from the Lower Yangtze region, South China, *Marine and Petroleum Geology*, v. 120, p. 1-15, <https://doi.org/10.1016/j.marpetgeo.2020.104564>.

544.

- Zan, B.W., Yan, J.X., Liu, S.G., Mou, C.L., Ran, B., 2020, Llandovery (lower Silurian) nodular barite from the northern margin of Yangtze Block, South China, and its paleoceanographic implications, *Palaeogeography Palaeoclimatology Palaeoecology*, v. 537, p. 1-15, <https://doi.org/10.1016/j.palaeo.2019.109415>.
- Zan, B.W., Mou, C.L., Lash, G.G., Ge, X.Y., Wang, X.P., Wang, Q.Y., Yan, J.X., Chen, F.F., Jin, B., 2021, An integrated study of the petrographic and geochemical characteristics of organic-rich deposits of the Wufeng and Longmaxi formations, western Hubei Province, South China: Insights into the co-evolution of paleoenvironment and organic matter accumulation, *Marine and Petroleum Geology*, v. 132, p. 1-19, <https://doi.org/10.1016/j.marpetgeo.2021.105193>.
- Zhang, Q., 2019, Late Ordovician-Early Silurian Sedimentary Change and Event Sedimentation Study- Take the Dajiang area Of Qianbei as an example [MPhil thesis]: Chengdu, Chengdu University of Technology, 102 p (in Chinese with English abstract).
- Zhang, X., Zhang, T.S., Zhao, X.M., Zhu, H.H., Mihai, E.P., Chen, L., Yong, J.J., Xiao, Q., Li, H.J., 2021. Effects of astronomical orbital cycle and volcanic activity on organic carbon accumulation during Late Ordovician-Early Silurian in the Upper Yangtze area, South China. *Petroleum Exploration and Development*, v. 48, no. 4, p. 850-863, [https://doi.org/10.1016/S1876-3804\(21\)60071-X](https://doi.org/10.1016/S1876-3804(21)60071-X).
- Zhao, K., Du, X.B., Lu, Y.C., Hao, F., Liu, Z.H., Jia, J.X., 2021, Is volcanic ash responsible for the enrichment of organic carbon in shales? Quantitative characterization of organic-rich shale at the Ordovician-Silurian transition, *Geological Society of America Bulletin*, v. 133, no. 3-4, p. 837-848, <https://doi.org/10.1130/B35737.1>.

Table S2. Thickness of the thickest Late Ordovician-Early Silurian bentonite layer in the Yangtze Block

| Number | Wells/Sections | Abbreviation | Thickness of Thickest Bentonite/cm | Formation                 | References                         |
|--------|----------------|--------------|------------------------------------|---------------------------|------------------------------------|
| 1      | Nanbazi        | NBZ          | 2                                  | Wufeng–Longmaxi Formation | <a href="#">Su et al., 2003</a>    |
| 2      | Huanghuachang  | HHC          | 2                                  | Wufeng–Longmaxi Formation | <a href="#">Su et al., 2009</a>    |
| 3      | Anji           | AJ           | 10                                 | Wufeng–Longmaxi Formation | <a href="#">Wang et al., 2015</a>  |
| 4      | Qiliao         | QL2          | 10                                 | Wufeng–Longmaxi Formation | <a href="#">Wang et al., 2018</a>  |
| 5      | Gaolu          | GL           | 5                                  | Wufeng–Longmaxi Formation | <a href="#">Wang et al., 2018</a>  |
| 6      | Datianba       | DTB          | 10                                 | Wufeng–Longmaxi Formation | <a href="#">Wang et al., 2018</a>  |
| 7      | Hongyanxi      | HYX          | 12                                 | Wufeng–Longmaxi Formation | <a href="#">Wang et al., 2018</a>  |
| 8      | Xintian        | XT           | 12                                 | Wufeng–Longmaxi Formation | <a href="#">Wang et al., 2018</a>  |
| 9      | Guanwu         | GW           | 10                                 | Wufeng–Longmaxi Formation | <a href="#">Wang et al., 2018</a>  |
| 10     | Bailu          | BL           | 10                                 | Wufeng–Longmaxi Formation | <a href="#">Wang et al., 2018</a>  |
| 11     | Xiema          | XM           | 15                                 | Wufeng–Longmaxi Formation | <a href="#">Wang et al., 2018</a>  |
| 12     | Guanyinqiao    | GYQ          | 8                                  | Wufeng–Longmaxi Formation | <a href="#">Wang et al., 2018</a>  |
| 13     | Shuanghe       | SH           | 40                                 | Wufeng–Longmaxi Formation | <a href="#">Wang et al., 2018</a>  |
| 14     | Maoba          | MB           | 2                                  | Wufeng–Longmaxi Formation | <a href="#">Wang et al., 2019</a>  |
| 15     | Bayu           | BY           | 1                                  | Wufeng–Longmaxi Formation | <a href="#">Wang et al., 2019</a>  |
| 16     | Huangcao       | HC           | 0.2                                | Wufeng–Longmaxi Formation | <a href="#">Wang et al., 2019</a>  |
| 17     | Xingwen        | XW           | 10                                 | Wufeng–Longmaxi Formation | <a href="#">Li et al., 2019</a>    |
| 18     | Liziping       | LZP          | 8                                  | Wufeng–Longmaxi Formation | <a href="#">Xiong et al., 2019</a> |
| 19     | Yanzi          | YZ           | 3                                  | Wufeng–Longmaxi Formation | <a href="#">Xiong et al., 2019</a> |
| 20     | Liangbai       | LBP          | 2                                  | Wufeng–Longmaxi Formation | <a href="#">Ge et al, 2019</a>     |
| 21     | Wuxing         | WX           | 10                                 | Wufeng–Longmaxi Formation | <a href="#">Ge et al, 2019</a>     |
| 22     | Lunshan        | LS           | 11                                 | Wufeng–Longmaxi Formation | <a href="#">Yang et al, 2019</a>   |
| 23     | Songmutang     | SMT          | 1                                  | Wufeng–Longmaxi Formation | <a href="#">Liu et al, 2020</a>    |
| 24     | PY-1           | PY1          | 2                                  | Wufeng–Longmaxi Formation | <a href="#">Liu et al, 2020</a>    |
| 25     | JY-1           | JY1          | 2                                  | Wufeng–Longmaxi Formation | <a href="#">Liu et al, 2020</a>    |
| 26     | Gaojiabian     | GJB          | 139.5                              | Wufeng–Longmaxi Formation | <a href="#">Tang et al, 2020</a>   |
| 27     | Jiuxi          | JX           | 71.1                               | Wufeng–Longmaxi Formation | <a href="#">Tang et al, 2020</a>   |
| 28     | XY-1           | XY-1         | 9.6                                | Wufeng–Longmaxi Formation | <a href="#">Zan et al, 2021</a>    |
| 29     | YT3            | YT3          | 5                                  | Wufeng–Longmaxi Formation | <a href="#">Shen et al, 2021</a>   |
| 30     | JY11           | JY11         | 2                                  | Wufeng–Longmaxi Formation | <a href="#">Lu et al, 2022a</a>    |
| 31     | Chengkou       | CK           | 11                                 | Wufeng–Longmaxi Formation | <a href="#">Wang et al, 2022</a>   |
| 32     | W213           | W213         | 2                                  | Wufeng–Longmaxi Formation | <a href="#">This study</a>         |
| 33     | W214           | W214         | 0.8                                | Wufeng–Longmaxi Formation | <a href="#">This study</a>         |
| 34     | L204           | L204         | 2                                  | Wufeng–Longmaxi Formation | <a href="#">This study</a>         |
| 35     | L205           | L205         | 1                                  | Wufeng–Longmaxi Formation | <a href="#">This study</a>         |
| 36     | N222           | N222         | 2                                  | Wufeng–Longmaxi Formation | <a href="#">This study</a>         |

125 REFERENCES CITED

126 Ge, X.Y., Mou, C.L., Wang, C.S., Men, X., Chen, C., Hou, Q., 2019, Mineralogical and geochemical characteristi  
127 cs of K-bentonites from the Late Ordovician to the Early Silurian in South China and their geological signifi

- cance, *Geological Journal*, v. 54, no. 1, p. 514-528, <https://doi.org/10.1002/gj.3201>.
- Li, Y.F., Zhang, T.W., Shao, D.Y., Shen, B.J., 2019, New U-Pb zircon age and carbon isotope records from the Lower Silurian Longmaxi Formation on the Yangtze Platform, South China: Implications for stratigraphic correlation and environmental change, *Chemical Geology*, v. 509, p. 249-260, <https://doi.org/10.1016/j.chemgeo.2019.02.003>.
- Liu, W., Liu, Y., Zeng, Z.X., Yang, B.Z., Peng, L.H., Xu, D.L., Wei, Y.X., Li, Y.Q., Ellam, R.M., Xu, S., 2020, K-bentonites in Ordovician-Silurian transition from South China: implications for tectonic evolution in the northern margin of Gondwana, *Journal of the Geological Society*, v. 177, no. 6, p. 1245-1260, <https://doi.org/10.1144/jgs2020-049>.
- Lu, Y.B., Hao, F., Shen, J., Lu, Y.C., Song, H.Y., Wang, Y.X., Gou, Q.Y., 2022, High-resolution volcanism-induced oceanic environmental change and its impact on organic matter accumulation in the Late Ordovician Upper Yangtze Sea, *Marine and Petroleum Geology*, v. 136, p. 1-15, <https://doi.org/10.1016/j.marpetgeo.2021.105482>.
- Shen, J.J., Wang, P.W., Chen, K.Q., Zhang, D.T., Wang, Y.M., Cai, Q.S., Meng, J.H., 2021, Relationship between volcanic activity and enrichment of shale organic matter during the Ordovician-Silurian transition in western Hubei, Southern China, *Palaeogeography Palaeoclimatology Palaeoecology*, v. 577, p. 1-18, <https://doi.org/10.1016/j.palaeo.2021.110551>.
- Su, W.B., He, L.Q., Wang, Y.B., Gong, S.Y., Zhou, H.Y., 2003, K-bentonite beds and high-resolution integrated stratigraphy of the uppermost Ordovician Wufeng and the lowest Silurian Longmaxi formations in South China, *Science in China Series D-Earth Sciences*, v. 46, no. 11, p. 1121-1133, <https://doi.org/10.1360/01yd0225>.
- Tang, L., Song, Y., Jiang, S., Jiang, Z.X., Li, Z., Yang, Y.D., Li, X.H., Xiao, L., 2020, Organic matter accumulation of the Wufeng-Longmaxi shales in southern Sichuan Basin: Evidence and insight from volcanism, *Marine and Petroleum Geology*, v. 120, p. 1-20, <https://doi.org/10.1016/j.marpetgeo.2020.104564>.
- Wang, Y.M., Li, X.J., Chen, B., Han, J., Zhang, J.M., Yuan, F., Ma, J., Dai, B., Wang, H., Jiang, S., 2018, Distribution characteristics and geological significance of the thickest Aeronian bentonite bed in Middle-Upper Yangtze Region, *Natural Gas Geoscience*, v. 29, no. 1, p. 42-54 (in Chinese with English abstract), DOI:10.11764/j.issn.1672-1926.2017.11.012.
- Wang, Y.M., Li, X.J., Wang, H., Jiang, S., Chen, B., Ma, J., Dai, B., 2019, Developmental characteristics and geological significance of the bentonite in the Upper Ordovician Wufeng - Lower Silurian Longmaxi Formation in eastern Sichuan Basin, SW China, *Petroleum Exploration and Development*, v. 46, no. 4, p. 687-700, [https://doi.org/10.1016/S1876-3804\(19\)60226-0](https://doi.org/10.1016/S1876-3804(19)60226-0).
- Wang, Y.M., Wang, H.Y., Qiu, Z., Shen, J.J., Zhang, Q., Zhang, L.F., Wang, C.H., Li, X.J., 2022, Basic characteristics of key interfaces in Upper Ordovician Wufeng Formation - Lower Silurian Longmaxi Formation in Sichuan Basin and its periphery, SW China, *Petroleum Exploration and Development*, v. 49, no. 1, p. 37-51, [https://doi.org/10.1016/S1876-3804\(22\)60003-X](https://doi.org/10.1016/S1876-3804(22)60003-X).
- Wang, L.W., Zhang, J.F., Chen, J.H., Zhang, Y.D., Chen, X.Y., Zhu, C.H., Liu, J., Hu, Y.H., Ma, X., 2015, Characterization of Kaitian (Late Ordovician) K-bentonite From Anji Katia, Zhejiang Province, *Journal of Stratigraphy*, v. 39, no. 2, p. 155-168 (in Chinese with English abstract), DOI:10.19839/j.cnki.dcxzz.2015.02.004.
- Xiong, G.Q., Wang, J., Li, Y.Y., Yu, Q., Men, Y.P., Zhou, X.L., Xiong, X.H., Zhou, Y.X., Yang, X., 2019, Zircon U-Pb dating of K-bentonite from Late Ordovician Wufeng Formation and Earlier Silurian Longmaxi Formation in the eastern section of south Dabashan and its tectonic significance, *Acta Geologica Sinica*, v. 93, no. 4, p. 843-864 (in Chinese with English abstract), DOI:10.19762/j.cnki.dizhixuebao.2019125.
- Yang, S.C., Hu, W.X., Wang, X.L., Jiang, B.Y., Yao, S.P., Sun, F.N., Huang, Z.C., Zhu, F., 2019, Duration, evolution, and implications of volcanic activity across the Ordovician-Silurian transition in the Lower Yangtze region



ion, South China, Earth and Planetary Science Letters, v. 518, p. 13-25, <https://doi.org/10.1016/j.epsl.2019.04.020>.

Zan, B.W., Mou, C.L., Lash, G.G., Ge, X.Y., Wang, X.P., Wang, Q.Y., Yan, J.X., Chen, F.F., Jin, B., 2021, An integrated study of the petrographic and geochemical characteristics of organic-rich deposits of the Wufeng and Longmaxi formations, western Hubei Province, South China: Insights into the co-evolution of paleoenvironment and organic matter accumulation, Marine and Petroleum Geology, v. 132, p. 1-19, <https://doi.org/10.1016/j.marpetgeo.2021.105193>.

180

Table S3. Global organic carbon content of main shales from Late Ordovician–Early Silurian

| Number | Region                                                           | Geologic period                    | Formation                                                  | Original carbon<br>seal stock/t | References                           |
|--------|------------------------------------------------------------------|------------------------------------|------------------------------------------------------------|---------------------------------|--------------------------------------|
| 1      | Murzuq Basin,<br>Libya                                           | Early Silurian                     | Tanezzuft Fm.                                              | 23537070067.50                  | <a href="#">Fello et al., 2006</a>   |
| 2      | Tarim basin                                                      | Late Ordovician                    | Yingan-Saergan Fm.                                         | 211833481179.38                 | <a href="#">Qiao et al., 2016</a>    |
| 3      | Yangtze region                                                   | Early Silurian                     | Longmaxi Fm.                                               | 4504064735770.90                | <a href="#">Zou et al., 2019</a>     |
| 4      | Yangtze region                                                   | Late Ordovician                    | Wufwng Fm.                                                 | 78428595963.30                  | <a href="#">Zou et al., 2019</a>     |
| 5      | Ghadames Basin<br>in the Libya,<br>Algeria and<br>Tunisia region | Early Silurian–<br>Middle Silurian | Tanezzuft Fm.                                              | 3129540853972.50                | <a href="#">Albriki et al., 2022</a> |
| 6      | Southern Iran and<br>the Arabian Plate                           | Early Silurian                     | Tanf-Mudawwara-Akka-Qusaiba-<br>Dadas-Sarchahan-Sahmah Fm. | 8183729932939.28                | <a href="#">Rahmani et al., 2022</a> |
| SUM    |                                                                  |                                    |                                                            | 16131134669892.90               |                                      |

181

182 **REFERENCES CITED**

183 Albriki, K., Wang, F., Li, M., El Zaroug, R., Ali, A., Samba, M., Wiping, F., Mohammed, R.S. 2022, Silurian h  
184 ot shale occurrence and distribution, organofacies, thermal maturation, and petroleum generation in Ghadames  
185 Basin, North Africa, *Journal of African Earth Sciences*, v. 189, p. 104497, [https://doi.org/10.1016/j.jafrearsci.20](https://doi.org/10.1016/j.jafrearsci.2022.104497)  
186 22.104497.

187 Fello, N., Lüning, S., Storch, P., Redfern, J., 2006, Identification of early Llandovery (Silurian) anoxic palaeo-depr  
188 essions at the western margin of the Murzuq Basin (southwest Libya), based on gamma-ray spectrometry in s  
189 urface exposures, *Geoarabia*, v. 11, no. 3, p. 101-118, <https://doi.org/10.2113/geoarabia1103101>.

190 Qiao, J.Q., Liu, L.F., Shen, B.J., Hu, Q., 2016, Formation of Ordovician Shale Gas and Prediction of Favorable Z  
191 ones in Tarim Basin, *Xinjiang Petroleum Geology*, v. 37, no. 4, p. 409-416, DOI: 10.7657/XJPG20160405.

192 Rahmani, A., Naderi, M., Hosseiny, E., 2023, Shale gas potential of the lower Silurian hot shales in southern Iran  
193 and the Arabian Plate: Characterization of organic geochemistry, *Petroleum*, v. 9, no. 4, p. 499-507, [https://d](https://doi.org/10.1016/j.petlm.2022.03.004)  
194 oi.org/10.1016/j.petlm.2022.03.004.

195 Zou, C.N., Zhu, R.K., Chen, Z.Q., Ogg, J.G., Wu, S.T., Dong, D.Z., Qiu, Z., Wang, Y.M., Wang, L., Lin, S.H.,  
196 Cui, J.W., Su, L., Yang, Z., 2019, Organic-matter-rich shales of China, *Earth-Science Reviews*, v. 189, p. 51-  
197 78, <https://doi.org/10.1016/j.earscirev.2018.12.002>.
